# Supplementary material for: Designed C3N4/CdS–CdWO4 core–shell heterostructure with excellent photocatalytic activity
Source: Royal Society of Chemistry journal article supplement (doi:10.1039/c6nj03575b), 2016-12-17
Supplement: c6nj03575b1.pdf [file c6nj03575b1.pdf]

Electronic Supplementary Information

**Designed C<sub>3</sub>N<sub>4</sub>/CdS-CdWO<sub>4</sub> core-shell heterostructure with excellent  
photocatalytic activity**

Qizhao Wang<sup>\*a,b</sup>, Yanbiao Shi,<sup>a</sup> Yang Sun,<sup>a</sup> Houde She,<sup>a</sup> Jie Yu<sup>a</sup> and Yuying Yang<sup>a</sup>

*<sup>a</sup>College of Chemistry and Chemical Engineering, Northwest Normal University, Lanzhou*

*730070, China*

*<sup>b</sup>Key Laboratory of Eco-Environment-Related Polymer Materials, Ministry of Education of*

*China, Lanzhou 730070, China*

\*Corresponding author. Tel: +86 931 7972677; Fax: +86 931 7972677.

E-mail: wangqizhao@163.com; qizhaosjtu@gmail.com(Q. Wang).

Text

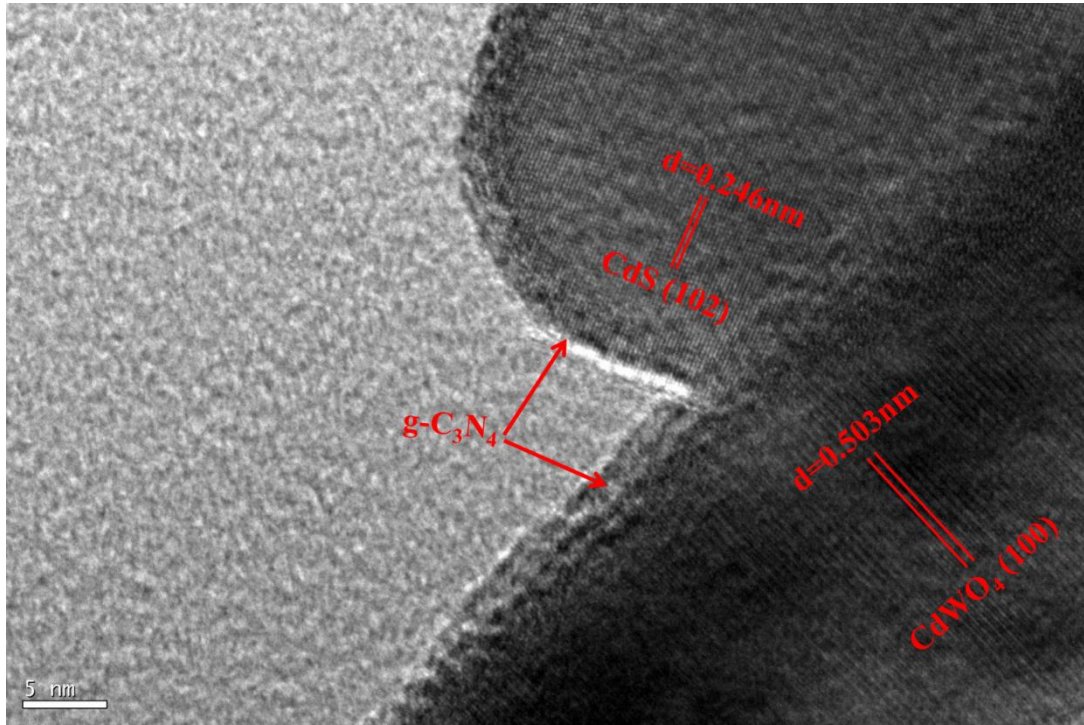

Fig. S1 HRTEM image of 10CN-CSW core-shell photocatalyst.

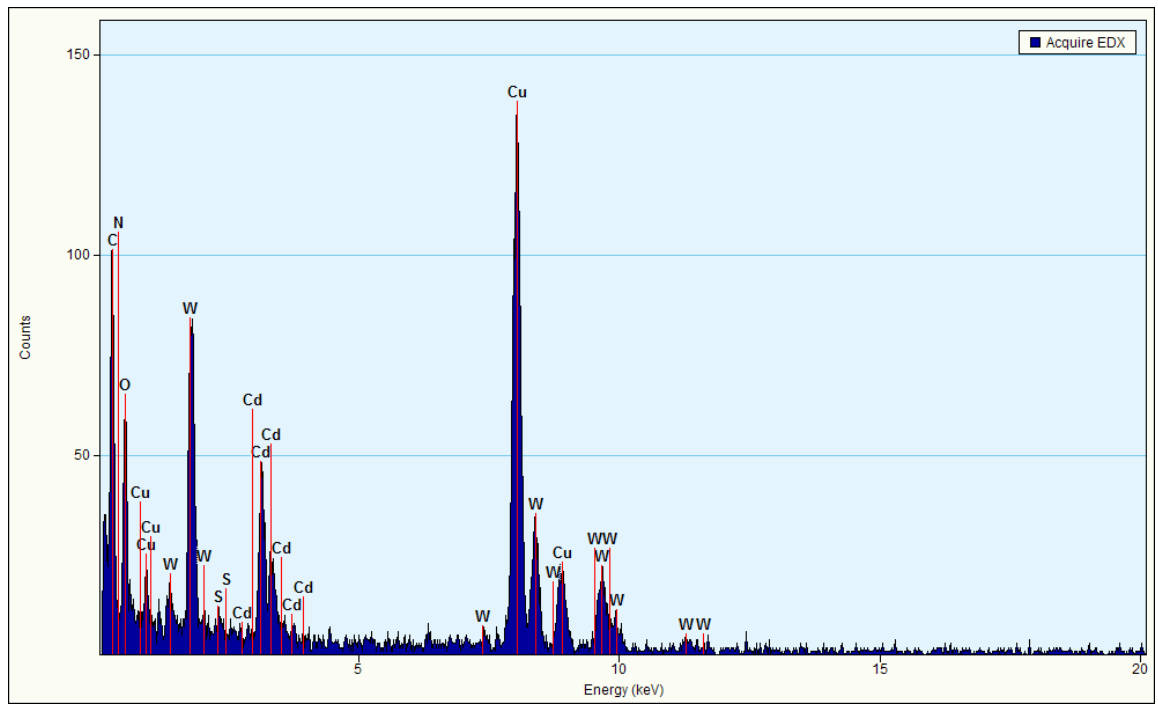

Fig. S2 EDX spectrum of 10CN-CSW core-shell photocatalyst.
